# Supplementary material
Source: publisher figshare collection journal article supplement (https://frontiersin.figshare.com/ndownloader/files/14699483)

## Supplemental information

**Supplemental Table S1** Quality assessment of included studies using the New-castle–Ottawa Scale for cohort studies

| Study                          | Selections |   |   |   | Comparability | Outcome |   |   | Score |
|--------------------------------|------------|---|---|---|---------------|---------|---|---|-------|
|                                | A          | B | C | D |               | F       | G | H |       |
| Azoulay et al., 2017           | 1          | 1 | 1 |   | 1             | 1       | 1 | 1 | 7     |
| Boiardi et al., 2008           | 1          | 1 |   |   | 2             | 1       | 1 |   | 6     |
| Chaichana et al., 2013         | 1          | 1 | 1 |   | 1             | 1       | 1 | 1 | 7     |
| Chen et al., 2018              | 1          | 1 | 1 |   | 1             | 1       | 1 |   | 6     |
| Clarke et al., 2011            | 1          | 1 | 1 |   | 1             | 1       | 1 |   | 6     |
| Delgado-Fernandez et al., 2017 | 1          | 1 | 1 |   | 1             | 1       | 1 | 1 | 7     |
| Filippini et al., 2008 (I)     | 1          | 1 | 1 |   | 2             | 1       | 1 | 1 | 8     |
| Filippini et al., 2008 (II)    | 1          | 1 | 1 |   | 2             | 1       | 1 | 1 | 8     |
| Goldman et al., 2018           | 1          | 1 | 1 |   | 2             | 1       | 1 | 1 | 8     |
| Nava et al., 2014 (I)          | 1          | 1 | 1 | 1 | 2             | 1       | 1 | 1 | 9     |
| Nava et al., 2014 (II)         | 1          | 1 | 1 | 1 | 2             | 1       | 1 | 1 | 9     |
| Ortega et al., 2016            | 1          | 1 | 1 |   | 1             | 1       | 1 |   | 6     |
| Skeie et al., 2012             | 1          | 1 | 1 |   | 2             | 1       | 1 | 1 | 8     |
| Suchorska et al., 2016         | 1          | 1 | 1 | 1 | 1             | 1       | 1 | 1 | 8     |
| Tully et al., 2016             | 1          | 1 | 1 |   | 1             | 1       | 1 | 1 | 7     |
| Tugcu et al., 2010             | 1          | 1 | 1 |   | 1             | 1       | 1 | 1 | 7     |
| Woernle et al., 2015           | 1          | 1 | 1 |   | 1             | 1       | 1 |   | 6     |
| Zanello et al., 2017           | 1          | 1 | 1 |   | 1             | 1       | 1 | 1 | 7     |
| Kim et al., 2015               | 1          | 1 | 1 |   | 2             | 1       | 1 | 1 | 8     |
| Stark et al., 2007             | 1          | 1 | 1 |   | 1             | 1       | 1 |   | 6     |
| McGirt et al., 2009            | 1          | 1 | 1 |   | 2             | 1       | 1 |   | 7     |
| Sastry et al., 2018            | 1          | 1 | 1 |   | 2             | 1       | 1 | 1 | 8     |
| Wann et al., 2018              | 1          | 1 | 1 |   | 1             | 1       | 1 |   | 6     |

A, representativeness of the exposed cohort: highly representative or somewhat representative (one star); no description (no score). B, selection of the non-exposed cohort: patients drawn from the same community as the exposed cohort (one score); patients drawn from a different source or no description (no score). C, ascertainment of exposure: information collected from secure record or structured interview (one score); no description (no score). D, demonstration that outcome of interest was not present at start of study: yes (one score), no (no score). E, comparability of cohorts on the basis of the design or analysis: study controls for important factor, time to recurrence, *MGMT* promoter status/*IDH1* mutation, initial extent of resection, age, treatment (two scores: time to recurrence is essential, at least other 3 factor was included, one star: time to recurrence was ignored, and some of them were included.). F, assessment of out-come: independent blind assessment or record linkage (one score); self-report or no description (no star). G, follow-up long enough for outcomes to occur: yes (one score); no (no score). H, adequacy of follow-up of cohorts: complete follow-up (one score); follow-up rate\80% and no description of those lost (no score); no statement (no score).

**Supplemental Figure S1** Egger's test to evaluate the publication bias for overall survival (A) and post-progression survival (B).

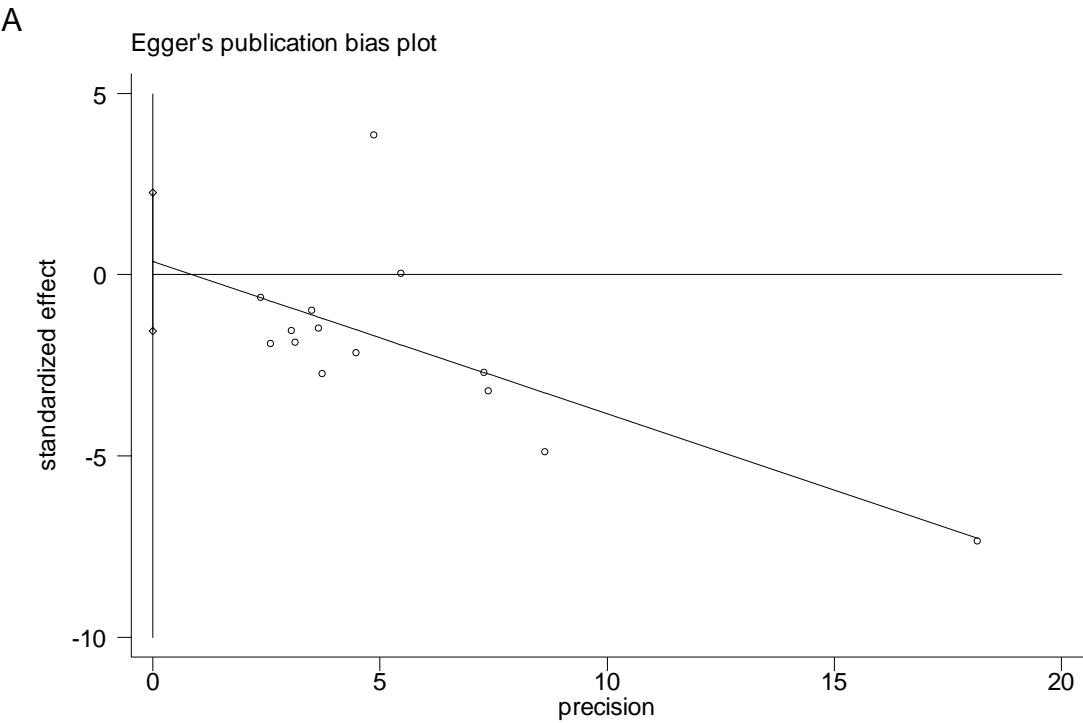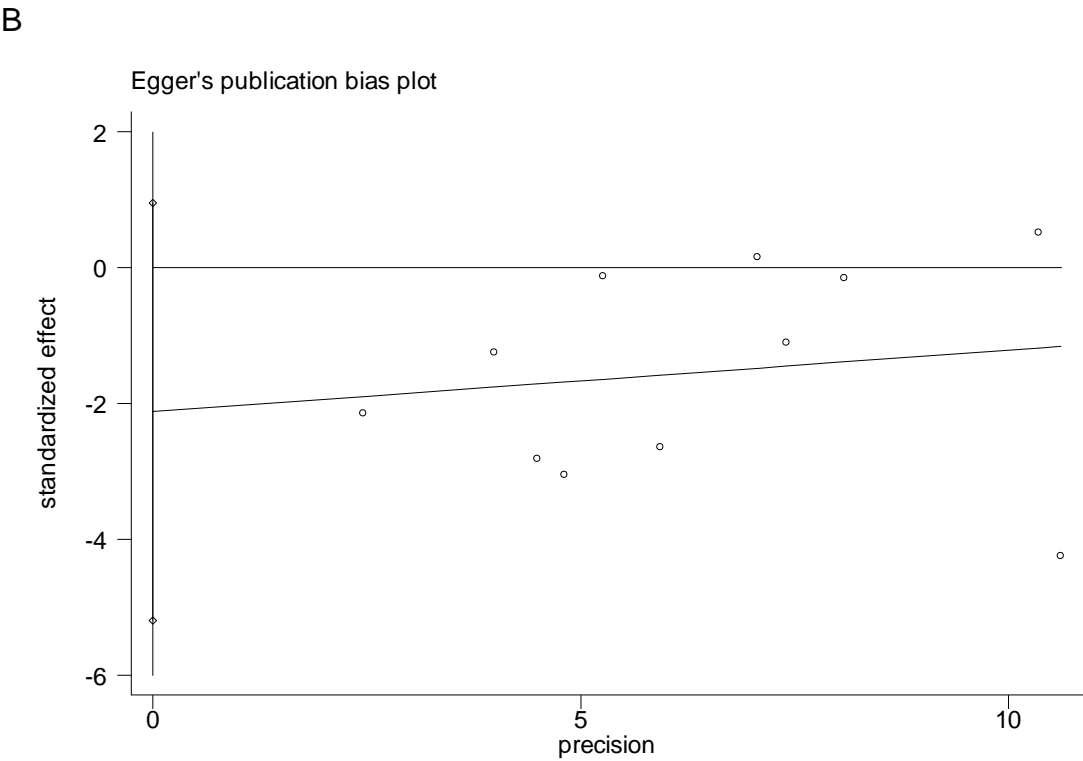

**Supplemental Figure S2** Sensitivity analysis for overall survival (A) and post-progression survival (B).

**A**

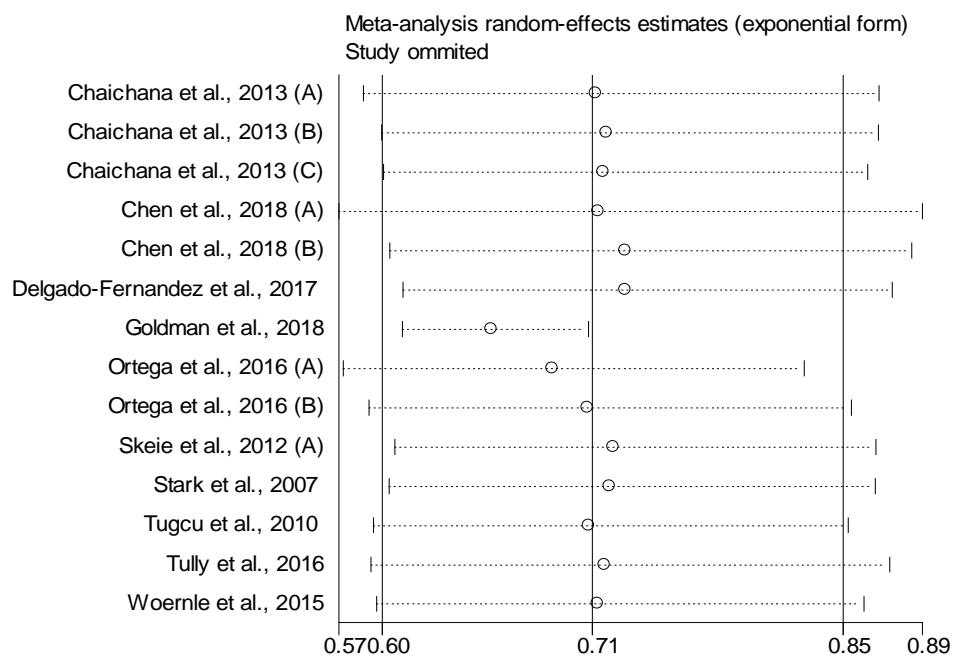

**B**

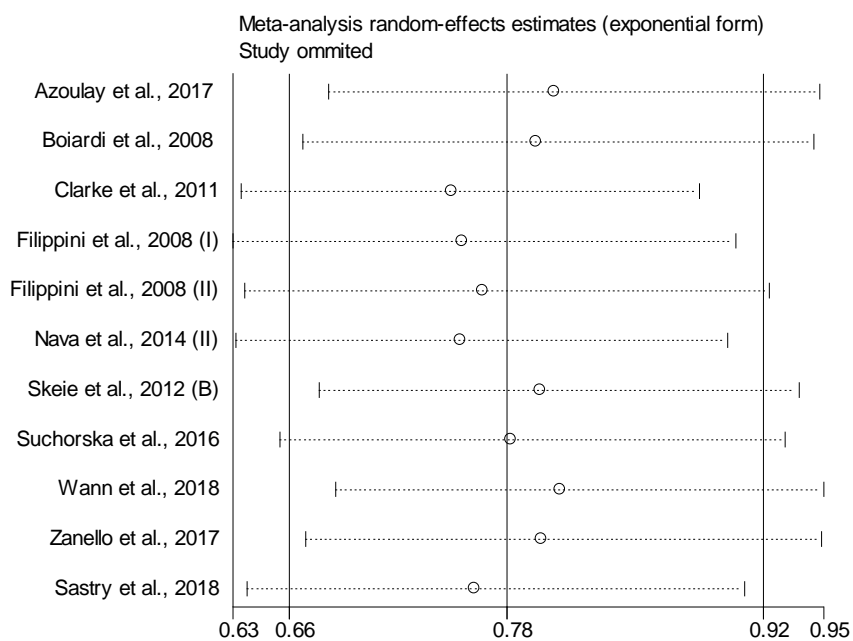

**Supplemental Figure S3** Forest plots for hazard ratios comparing OS in patients who underwent one reoperation vs multiple reoperation.

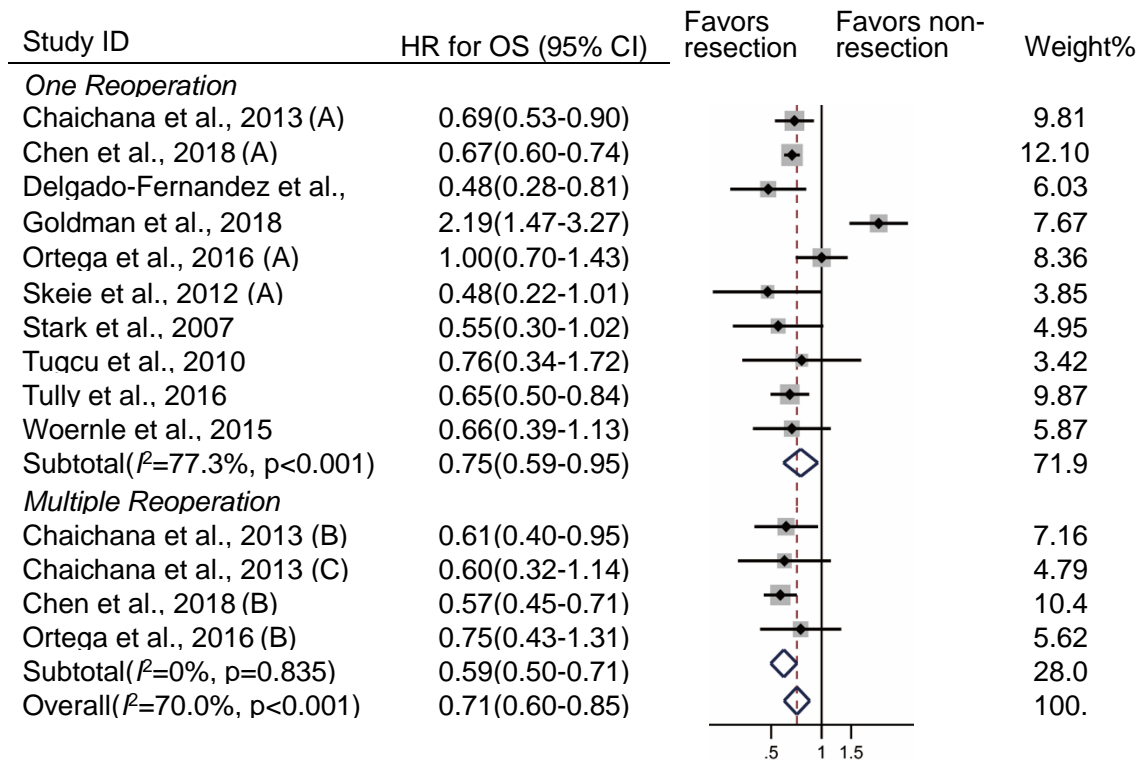

Supplement: Supplementary file [file 14699483]
